# Supplementary material
Source: PubMed Central journal article supplement (PMC4996723)
Supplement: NIHMS808504-supplement.pdf [file NIHMS808504-supplement.pdf]

**Supplementary Table 1: Standardized mean differences for characteristics of the matched study cohorts.\* †**

|                                                    | Standardized mean differences |
|----------------------------------------------------|-------------------------------|
| <i>Demographic characteristics</i>                 |                               |
| Age                                                | -0.027                        |
| Male sex                                           | 0.018                         |
| Race                                               |                               |
| White                                              | -0.003                        |
| Black                                              | 0.019                         |
| Hispanic                                           | -0.008                        |
| Other or unknown                                   | -0.017                        |
| <i>Pre-existing medical conditions</i>             |                               |
| Congestive heart failure                           | 0.001                         |
| Acute myocardial infarction                        | -0.026                        |
| Arrhythmia                                         | -0.018                        |
| Hypotension or hypoperfusion                       | 0.053                         |
| Respiratory insufficiency                          | —                             |
| Sepsis or pneumonia                                | 0.018                         |
| Metabolic or electrolyte abnormality               | -0.045                        |
| Renal insufficiency                                | -0.001                        |
| Hepatic insufficiency                              | —                             |
| Central nervous system depression                  | -0.002                        |
| Major trauma                                       | 0.041                         |
| Cancer                                             | —                             |
| <i>Characteristics before cardiac arrest event</i> |                               |
| Patient illness category                           |                               |
| Medical cardiac                                    | -0.036                        |
| Medical non-cardiac                                | -0.002                        |
| Surgical cardiac                                   | -0.008                        |
| Surgical non-cardiac                               | 0.020                         |
| Trauma                                             | 0.048                         |
| Other or unknown                                   | 0.006                         |
| Pulse oximeter placement                           | 0.004                         |
| Electrocardiography monitoring                     | <0.001                        |
| Arterial catheter placement                        | -0.006                        |
| Assisted or mechanical ventilation                 | 0.046                         |
| Vascular access                                    | 0.015                         |
| Vasoactive infusion                                | 0.017                         |
| <i>Characteristics of cardiac arrest event</i>     |                               |
| Location of event                                  |                               |
| Intensive care unit                                | 0.016                         |
| Inpatient monitored                                | -0.007                        |
| Inpatient ward                                     | -0.011                        |
| Emergency department                               | -0.013                        |
| Other or unknown                                   | -0.011                        |
| Night or weekend event‡                            | -0.005                        |
| Immediate cause of arrest                          |                               |
| Acute myocardial infarction                        | —                             |
| Hypotension or hypoperfusion                       | 0.023                         |
| Acute respiratory insufficiency                    | -0.026                        |
| Inadequate invasive airway                         | -0.009                        |

|                                                  |        |
|--------------------------------------------------|--------|
| Acute pulmonary edema                            | —      |
| Acute pulmonary embolism                         | —      |
| Metabolic or electrolyte abnormality             | —      |
| First documented rhythm                          |        |
| Asystole or pulseless electrical activity        | -0.036 |
| Ventricular fibrillation or tachycardia          | -0.036 |
| Number of shocks                                 | —      |
| Bradycardia                                      | -0.002 |
| Other or unknown                                 | -0.021 |
| Duration of resuscitation                        | 0.032  |
| <i>Pharmacologic interventions during arrest</i> |        |
| Epinephrine bolus                                | 0.024  |
| Sodium bicarbonate                               | 0.009  |
| Calcium chloride or gluconate                    | 0.022  |
| Atropine                                         | 0.030  |
| Fluid bolus                                      | 0.032  |
| Lidocaine                                        | -0.008 |
| Amiodarone                                       | -0.022 |
| Magnesium sulfate                                | 0.015  |
| Dextrose bolus                                   | —      |
| <i>Calendar year</i>                             |        |
| 2006/2007                                        | -0.006 |
| 2008                                             | 0.022  |
| 2009                                             | -0.005 |
| 2010                                             | -0.035 |
| 2011                                             | <0.001 |
| 2012                                             | 0.027  |

\* Standardized mean differences calculated as the difference in means between participants with and without any monitoring, divided by the standard deviation among participants without monitoring.

† A ‘—’ indicates that the variable was not included in the propensity score because it was balanced in both the matched and unmatched cohorts.

‡ Night: 11:00pm to 6:59am; Weekend: Friday 11:00pm to Monday 6:59am.

## **Appendix**

### **Get With The Guidelines-Resuscitation Investigators:**

Besides the authors Dana P. Edelson, MD, MS and Raina Merchant, MD, MSHP, members of the Get With The Guidelines-Resuscitation Adult Research Task Force include:

Steven M. Bradley MD, MPH, VA Eastern Colorado Healthcare System; Saket Girotra, MD, University of Iowa Carver College of Medicine; Paul S. Chan, MD MSc, Saint Luke's Mid America Heart Institute; Michael W. Donnino, MD, Beth Israel Deaconess Medical Center; Robert T. Faillace, MD, ScM, Geisinger Healthcare System; Romergryko Geocadin, MD, Johns Hopkins University School of Medicine; Vincent N. Mosesso, Jr., MD, University of Pittsburgh School of Medicine; Joseph P. Ornato, MD and Mary Ann Peberdy, MD, Virginia Commonwealth University; and Mindy Smyth, MSN, RN.

February 12, 2016

Joseph P. Ornato, MD, FACP, FACC, FACEP  
*Resuscitation*: American Editor  
Virginia Commonwealth University Health System  
Department of Emergency Medicine  
401 N. 12<sup>th</sup> Street  
Richmond, VA 23298-525

RE: Statistical review letter  
Manuscript Title: Physiologic Monitoring of CPR Quality During Adult Cardiac Arrest:  
A Propensity-Matched Cohort Study  
Authors: Sutton et al.  
Project Statistician: Dr. Benjamin French Ph.D.

Dear Dr. Ornato,

This is a letter to confirm that I have reviewed the submitted work: “RESUS-D-15-00760, entitled “Physiologic Monitoring of CPR Quality During Adult Cardiac Arrest: A Propensity-Matched Cohort Study.” I conclude that the statistical approaches used, including propensity score nearest-neighbor matching, are appropriate for this study. In direct response to the reviewer’s request to evaluate the authors’ handling of missing values, their approach to coding ‘missing’ as a separate category so that the propensity score balanced the distribution of missingness between groups is also appropriate and valid (Rosenbaum & Rubin, 1984; Mattei, 2009). Overall, the analysis was proper, thought-full and well-done.

I am an Associate Professor of Biostatistics at the University of Pennsylvania in the Department of Biostatistics & Epidemiology. My particular expertise is in causal inference, the analysis of observational studies and propensity methods. As such, I am well qualified to provide this independent statistical review of the authors’ work. I was not part of the author group of the presented study and therefore have provided an unbiased assessment of the study analysis.

Please do not hesitate to contact me if you have any further concerns.

Sincerely,



Nandita Mitra, Ph.D.  
Associate Professor of Biostatistics
